# Supplementary material for: Quantifying pCO2 in biological ocean acidification experiments: A comparison of four methods
Source: PubMed Central journal article supplement (PMC5619781; doi:10.1371/journal.pone.0185469), 2017-09-28
Supplement: pone.0185469.s001.pdf [file pone.0185469.s001.pdf]

# Quantifying $p\text{CO}_2$ in biological ocean acidification experiments: a comparison of four methods

Sue-Ann Watson, Katharina E. Fabricius and Philip L. Munday

## Supplementary figure

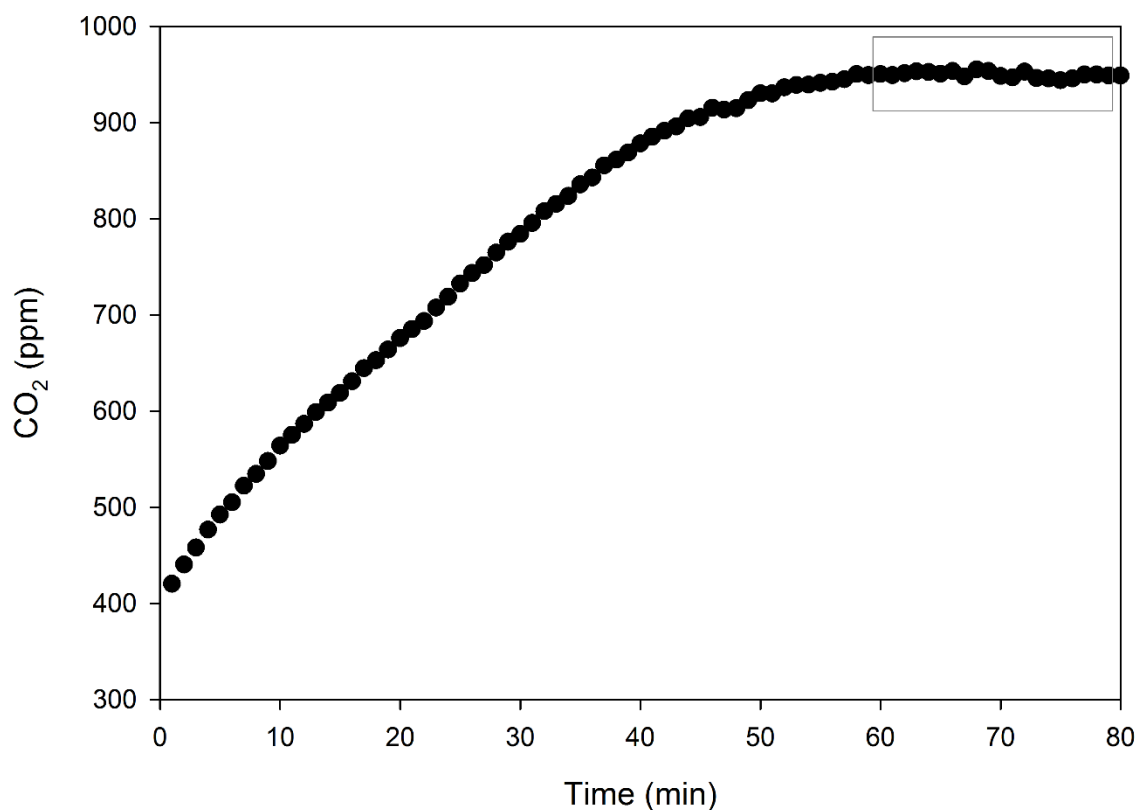

**S1 Fig.** CO<sub>2</sub> measurements recorded by the portable CO<sub>2</sub> equilibrator over time from the start of a test period until equilibrium is reached (boxed area). Stabilisation time was 1 hour. This time period is a conservative estimate since equilibration time is shorter if the  $p\text{CO}_2$  difference between two samples is less.
